## IMPAIRED IMMUNE METABOLISM IN SEPSIS

# 1 Impaired peripheral mononuclear cell metabolism in patients at risk of developing 2 sepsis: A cohort study

3

4 Velma Herwanto, MD<sup>1,2,3\*</sup>, Ya Wang, PhD<sup>2,4\*</sup>, Maryam Shojaei, PhD<sup>2,4#</sup>, Alamgir Khan,  
5 PhD<sup>5#</sup>, Kevin Lai, MD<sup>6&</sup>, Amith Shetty, MD PhD<sup>1,6&</sup>, Stephen Huang, PhD<sup>4&</sup>, Tracy Chew,  
6 PhD<sup>7&</sup>, Sally Teoh, RN<sup>4&</sup>, Marek Nalos, MD PhD<sup>4&</sup>, Mandira Chakraborty, MD PhD<sup>4&</sup>,  
7 Anthony S. McLean, Prof MD<sup>1,4&</sup>, Benjamin MP. Tang, MD PhD<sup>1,2,4\*</sup>

8

9 1. The University of Sydney School of Medicine, NSW, Australia

10 2. Centre for Immunology and Allergy Research, the Westmead Institute for Medical  
11 Research, NSW, Australia

12 3. Tarumanagara University, Faculty of Medicine, Jakarta, Indonesia

13 4. Department of Intensive Care Medicine, Nepean Hospital, NSW, Australia

14 5. Australian Proteome Analysis Facility, Macquarie University, NSW, Australia

15 6. Department of Emergency Medicine, Westmead Hospital, NSW, Australia

16 7. Sydney Informatics Hub, Core Research Facilities, The University of Sydney, NSW,  
17 Australia

18

19 Corresponding author:

20 E-mail: [vher6289@uni.sydney.edu.au](mailto:vher6289@uni.sydney.edu.au) (VH)

21 +62-8161820408

22

23 \*These authors contributed equally to this work

24 #These authors also contributed equally to this work

25 &These authors also contributed equally to this work

26

## 27 **Abstract**

### 28 **Purpose**

29 Dysregulated immune response is a key driver of disease progression in sepsis and known to  
30 be associated with impaired cellular metabolism. This association has been studied mostly in  
31 the late stage sepsis patients. Here, we investigate whether such impairment in cellular  
32 metabolism is present in uncomplicated infection patients who do not develop sepsis.

### 33 **Methods**

34 Forty sepsis (fulfilled Sepsis-3 criteria) and 27 uncomplicated infection patients were  
35 recruited from the emergency department along with 20 healthy volunteers. Whole blood was  
36 collected for measurement of gene expression, cytokine levels and cellular metabolic  
37 functions (including mitochondrial respiration, oxidative stress and apoptosis).

### 38 **Results**

39 Our analysis revealed the impairment of mitochondrial respiration in uncomplicated infection  
40 and sepsis patients (p value <0.05), with greater degree of impairment noted in the  
41 established sepsis. The impairment was significantly correlated with increased mitochondrial  
42 oxidative stress level; the latter was increased in uncomplicated infection and more so in  
43 established sepsis patients. Further analysis revealed that the oxidative stress level correlated  
44 significantly with cytokine level (tumor necrosis factor- $\alpha$ ) and gene expression levels (CYCS,  
45 TP53, SLC24A24 and TSPO).

### 46 **Conclusions**

47 These findings suggest that impaired immune cell metabolism is present in infection patients  
48 without presenting sepsis, thereby opening potential window for early diagnosis and  
49 intervention (e.g. antioxidant therapy) in such patients.

50 **Keywords:** cellular metabolism, mitochondrial respiration, glycolysis, oxidative stress,  
51 apoptosis, peripheral blood mononuclear cells, leukocyte, sepsis, uncomplicated infection,  
52 emergency department

## 53 **Introduction**

54 Sepsis is one of the most significant disease burdens in the world (1). A better understanding  
55 of sepsis disease mechanism is urgently needed to facilitate development of new therapies.  
56 Several pathophysiological mechanisms are involved, including endothelial dysfunction,  
57 coagulopathy and dysregulated immune response (2). Among these, dysregulated immune  
58 response is thought to play the most critical role in sepsis (3). The dysregulated immune  
59 response in sepsis is characterized by impaired innate and adaptive immune responses; both  
60 of which have been shown to strongly correlate with poor patient outcomes (4, 5).

61

62 It has been demonstrated that impaired cellular metabolism contributes to the dysregulated  
63 immune response in sepsis. The impaired cellular metabolism includes reduced cellular  
64 oxygen utilization and reduced ATP production (6-8). A number of studies in sepsis patients  
65 have confirmed that these impairments are associated with increased organ failures and  
66 reduced survival (9, 10).

67

68 Recent studies sought to identify defective pathways that are associated with impaired  
69 cellular metabolism in peripheral blood mononuclear cell (PBMC) of sepsis patients (11, 12).  
70 These studies have identified several defective cellular pathways such as inhibited  
71 mitochondrial complex activity and oxygen consumption, and reduced ATP production  
72 across different sepsis populations (13, 14). However, these studies share a common  
73 limitation; they were conducted in patients with established sepsis or in the late stage of  
74 sepsis. Therefore, it is uncertain whether impaired cellular metabolism is present prior to the  
75 development of sepsis.

76

77 In this study, we sought to measure cellular metabolic state of PBMC in infection phase by  
78 studying peripheral blood samples from patients who present to emergency department with  
79 suspected infections, in whom sepsis is yet to develop. The overall goal of the study is to  
80 detect early changes in the metabolic profile of circulating immune cells in the infection  
81 patients and compare them to that of patients who later develop sepsis.

82

83

## 84 **Material and methods**

### 85 **Subjects recruitment**

86 This study was approved by Human Research Ethics Committee at our institution (reference  
87 number HREC/18/WMEAD/67). Patients were recruited from the emergency department  
88 (ED) at Westmead Hospital, New South Wales, Australia, between February 2018 and July  
89 2019. Written informed consent was obtained from all subjects recruited. Inclusion criteria:  
90 subjects were eligible if they aged 18 years or older; presented to the ED within the last 24  
91 hours with infection, defined as either (1) positive pathogen identification in any body fluids  
92 sampled for microbiological culture, or (2) a suspicion of infection (as determined by treating  
93 physician) and received antibiotics. Exclusion criteria: (1) decision not to actively treat or  
94 resuscitate the patient at admission; and (2) inability to consent the patient.

95

96

### 97 **Case definitions**

98 The study participants were assigned into sepsis or uncomplicated infection groups, based on  
99 their Sequential Organ Failure Assessment (SOFA) score on admission ( $\geq 2$  and  $< 2$ ,  
100 respectively) in accordance with the international consensus definition of sepsis (“Sepsis-3”)

101 (15, 16). Healthy volunteers who did not have infection or any pre-existing comorbidities  
102 were recruited as controls.

103 Fig 1 illustrates the workflow of experiment.

104

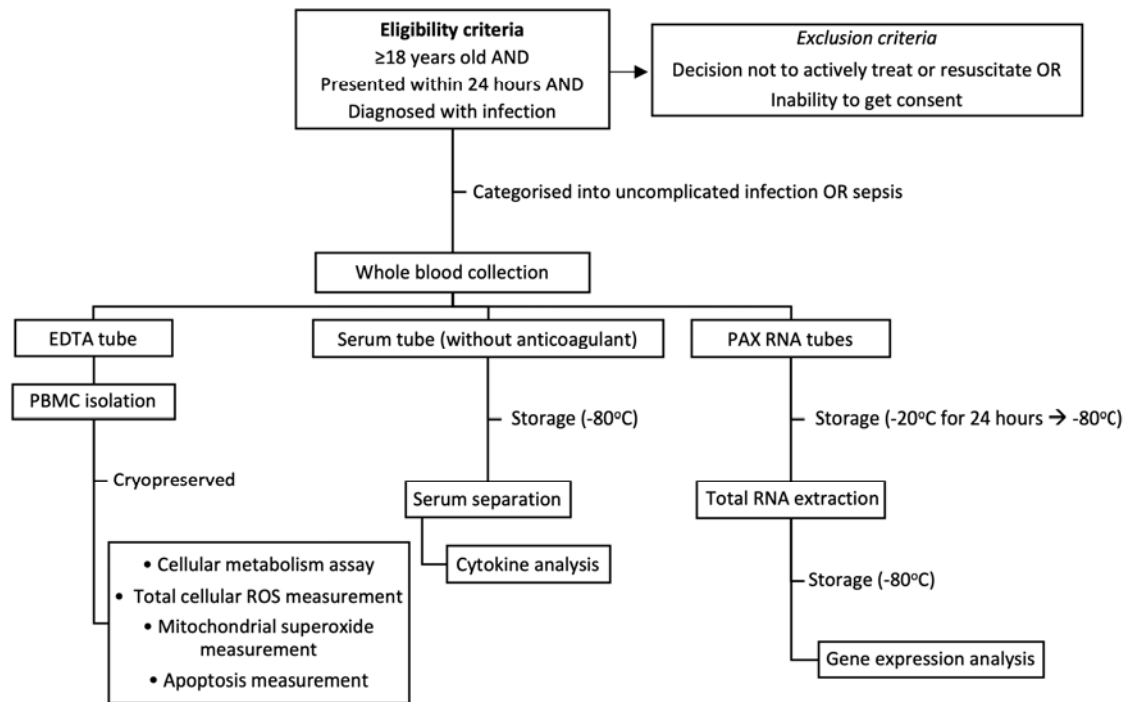

105

106 **Fig 1.** Experiment workflow of the study

107

108

## 109 **Gene expression profiling**

### 110 **RNA extraction**

111 Two and a half millilitres of whole blood, which was collected into PAXgene Blood RNA  
112 tube (BD Biosciences), was allowed to stand at room temperature for 2 hours, followed by  
113 storage at -20°C for 24 hours. Thereafter, the tubes were transferred to -80°C for long term  
114 storage. Total RNA was extracted using PAXgene Blood RNA Kit (QIAGEN) following the

115 manufacturer's protocol. Quantity and integrity of purified RNA were determined by the  
116 RNA integrity number (RIN) using TapeStation (Agilent Technologies Inc.).

### 117 **Gene expression by NanoString<sup>®</sup> Technology**

118 Gene expression was measured using Nanostring nCounter<sup>®</sup> Elements<sup>™</sup> TagSet  
119 (NanoString<sup>®</sup> Technologies Inc) preselected for mitochondrial biogenesis and function panel.  
120 The panel includes 90 human genes and 6 housekeeping genes (Table S1). One hundred  
121 nanograms of RNA from samples with RIN  $\geq 7.0$  was used for setting up the hybridization  
122 reaction. A standard nCounter Prep Station was set up on the workstation for post-  
123 hybridization processing. After which, sample cartridge was removed, sealed and loaded into  
124 the Digital Analyzer to be scanned. Data resolution was set to high (280 images per sample).

125

126

### 127 **Gene expression data analyses**

128 nCounter data files (RCC files) were imported into the nSolver<sup>™</sup> analysis software v4.0  
129 (NanoString Technologies) for quality control and raw mRNA abundance frequencies  
130 analysis. Quality control was performed with the built-in negative and positive controls  
131 following recommendations by NanoString Technologies. Raw data was normalized against  
132 the geometric mean of 6 housekeeping genes included in the codeset. The expression level  
133 was presented as fractional difference. It was calculated by dividing the difference between  
134 the pooled expression values of patient and of healthy control, with pooled expression values  
135 of healthy control. Pathway analysis was performed with Reactome Pathway Portal version  
136 3.2 (17).

137

138

139

140

## 141 **Measurement of serum cytokines**

142 Whole blood collected in tube without anticoagulant was allowed to clot for 30 minutes to 1  
143 hour at room temperature before centrifugation at 1,600 x g for 15 minutes at room  
144 temperature. Supernatant was collected and stored at -80°C for further analyses.

145

146 Concentrations of cytokines were measured using the Bio-Plex Pro™ Human Cytokine  
147 Screening 6-Plex Panel (Bio-Rad Laboratories) according to the manufacturer's protocol.

148 Analytes measured were interleukin 1 beta (IL-1 $\beta$ ), interleukin 4 (IL-4), interleukin 6 (IL-6),  
149 interleukin 10 (IL-10), tumour necrosis factor alpha (TNF- $\alpha$ ) and interferon gamma (IFN- $\gamma$ ).

150 Briefly, thawed serum samples were centrifuged at 10,000 x g for 10 minutes at 4°C to  
151 remove cells. Fifty microliters of the duplicated serial-diluted standards and serum samples  
152 were added to 96-well plate which contained the pre-washed antibody coated microbeads.

153 The plate was sealed, followed by incubation at room temperature for 1 hour with shaking at

154 850 rotations per minute under dark. The plate was then washed 3 times with Bio-Plex Pro II

155 magnetic plate washer and incubated with detection antibody for 30 minutes followed by 3

156 times washes and incubation with streptavidin-PE for 10 minutes at room temperature under

157 dark. All the liquids were delivered to the assay plate using a robotic platform (epMotion

158 5075, Eppendorf). The plate was read with the Bio-Plex 200 system using the Bio-Plex

159 manager v6.1 software.

160

161

## 162 **Measurement of cellular metabolism**

163 Agilent Seahorse XF Analyser was used to measure two key parameters: oxygen

164 consumption rate (OCR) and extracellular acidification rate (ECAR). These parameters



165 reflect effectiveness of mitochondrial respiration (OCR) and glycolysis (ECAR), which  
166 provides an alternative energy pathway to mitochondrial respiration.

### 167 **Sample collection and preparation**

168 Whole blood sample was collected from healthy controls or study participants into tubes  
169 containing anticoagulant EDTA. Peripheral blood mononuclear cells were isolated from the  
170 whole blood using Ficoll. Isolated PBMCs were cryopreserved in freezing medium (fetal  
171 bovine serum (FBS) with 10% DMSO) and stored in Vapor Phase liquid nitrogen tank until  
172 further analyses.

173

### 174 **Cellular metabolism assay**

175 On the day of the assay, PBMCs were thawed and washed in RPMI + 10% FBS, and finally  
176 resuspended in Seahorse XF Assay Medium and seeded onto microplate pre-coated with  
177 Corning<sup>®</sup> Cell-Tak Cell and Tissue Adhesive (Bio-Strategy Pty Ltd) at  $5 \times 10^5$  cells per well.  
178 Each sample was analysed at least in triplicate. Metabolic profiling of PBMC was assessed  
179 with the use of cell mito stress test kit (Agilent Technologies, Inc.), which includes three  
180 drugs – oligomycin, carbonyl cyanide-4 (trifluoromethoxy) phenylhydrazone (FCCP) and  
181 rotenone/ antimycin A. These drugs were pre-titrated and 2  $\mu$ M oligomycin, 2  $\mu$ M FCCP and  
182 0.5  $\mu$ M rotenone/antimycin A were used for our assays. Sequential injections of these drugs  
183 allowed the calculations of parameters related to mitochondrial respiration, including basal  
184 respiration, maximal respiration, spare respiratory capacity and ATP production (18).

185

186 Data was analysed using the Wave Desktop software version 2.6. To normalize the data with  
187 cell number, total protein amount was quantified at the completion of the XF assay using  
188 Bradford protein assay kit (Bio-Rad) after cells in the wells were lysed with lysis buffer (10  
189 mM Tris, pH 7.4, 0.1% Triton X-100) (19).

190

191

## 192 **Measurement of Oxidative Stress**

### 193 **Total cellular reactive oxygen species (ROS)**

194 To detect total cellular ROS, cells were stained with 2',7' – dichlorofluorescein diacetate  
195 (DCFDA) Cellular ROS Detection Assay Kit (abcam) according to manufacturer's protocol.  
196 Briefly, thawed PBMCs, resuspended in RPMI + 10% FBS, were allowed to rest for 2 hours  
197 before staining with 20  $\mu$ M DCFDA for 30 minutes in 37°C CO<sub>2</sub> incubator. Stained cells  
198 were subjected to analyses by BD FACs CantoII flow cytometer (BD Biosciences).  
199 Application setting was applied each time before analyses. Data was analysed using FlowJo  
200 v10 (BD Biosciences). Results were expressed as median fluorescence intensity (MFI) after  
201 subtracting background from unstained samples.

202

### 203 **Mitochondrial superoxide**

204 To quantify mitochondrial superoxide, cells were stained with MitoSOX™ Red  
205 (Invitrogen) according to manufacturer's protocol. Briefly, thawed PBMCs were washed and  
206 resuspended in Hank's Balanced Salt Solution with calcium and magnesium (HBSS/Ca/Mg),  
207 followed by staining with 5  $\mu$ M MitoSOX™ Red for 10 minutes in 37°C CO<sub>2</sub> incubator.  
208 After staining, cells were washed twice and resuspended in HBSS/Ca/Mg, which were then  
209 subjected to flow cytometry analyses as above.

210

211

## 212 **Measurement of apoptosis**

213 Cell apoptosis was quantified using Annexin V-FITC Apoptosis Detection Kit (abcam)  
214 according to manufacturer's protocol. Cells were washed and resuspended in 1x binding  
215 buffer, followed by staining with Annexin V-FITC and propidium iodide (PI). Stained cells  
216 were subjected to flow cytometry analyses as above. The Annexin V positive and PI negative  
217 cells were assigned as apoptotic cells.

218

219

## 220 **Statistical analysis and data visualization**

221 All statistical analyses were performed using SPSS version 25 (IBM) and GraphPad Prism 8.  
222 For the normally distributed data, analyses were conducted using parametric test. For data  
223 that was not normally distributed, data transformation was performed and was then subjected  
224 to parametric test. If the transformation was not successful to normalise the data, the non-  
225 parametric test was used. Graphs were generated using GraphPad Prism 8. Heatmap was  
226 created using Morpheus software from Broad Institute  
227 (<https://software.broadinstitute.org/morpheus>) .

228

229

## 230 **Results**

### 231 **Patients characteristics**

232 Demographic and clinical characteristics of patients are summarized in Table 1. There was no  
233 significant difference in baseline characteristics between uncomplicated infection and sepsis  
234 groups except for age ( $p = 0.002$ ) and number of patients with existing comorbidities ( $p =$   
235  $0.015$ ). The average age of sepsis group was higher than that of uncomplicated infection  
236 group (means 69 vs 56). Twenty healthy samples were recruited as controls, twelve (60%) of

237 them were male. Their median age was 59 (28 – 72) years old. Sepsis patients had higher C-  
 238 reactive protein (CRP) and lactate levels as well as lower platelet count when compared to  
 239 the uncomplicated infection.

240 **Table 1. Patients Demographic and Clinical Characteristics (n = 67)**

| Characteristics                        | Uncomplicated Infection | Sepsis                  | P value       |
|----------------------------------------|-------------------------|-------------------------|---------------|
| N (%)                                  | 27 (40.3)               | 40 (59.7)               |               |
| Age – yr                               | 56.4 ± 18.12            | 69.1 ± 13.83            | <b>0.002</b>  |
| Male sex – no. (total no., %)          | 19 (70.4)               | 20 (50)                 | 0.099         |
| Source of infection                    |                         |                         |               |
| Respiratory tract (%)                  | 12 (44.4)               | 20 (50)                 | 0.6551        |
| Urinary tract (%)                      | 4 (14.8)                | 12 (30)                 | 0.1554        |
| Abdominal, liver and biliary tract (%) | 5 (18.5)                | 5 (12.5)                | 0.5022        |
| Skin and soft tissue (%)               | 4 (14.8)                | 5 (12.5)                | 0.7881        |
| Cardiovascular (%)                     | 0 (0)                   | 1 (2.5)                 | 0.4113        |
| Bone and joint (%)                     | 1 (3.7)                 | 1 (2.5)                 | 0.7787        |
| Unknown                                | 2 (7.4)                 | 1 (2.5)                 | 0.3450        |
| Comorbidities (%)                      | 21 (77.8)               | 39 (97.5)               | <b>0.0150</b> |
| Cardiovascular disease (%)             | 15 (55.6)               | 30 (75)                 | 0.0997        |
| Respiratory disease (%)                | 7 (25.9)                | 13 (32.5)               | 0.5654        |
| Diabetes mellitus (%)                  | 6 (22.2)                | 15 (37.5)               | 0.1887        |
| Malignancy (%)                         | 4 (14.8)                | 13 (32.5)               | 0.1050        |
| Chronic kidney disease (%)             | 3 (11.1)                | 6 (15)                  | 0.6485        |
| Septic shock (%)                       | NA                      | 10 (25.0)               | NA            |
| ICU admission (%)                      | 0 (0)                   | 9 (22.5)                | <b>0.0086</b> |
| Hospital readmission – 28 day (%)      | 2 (7.4)                 | 3 (7.5)                 | 0.9879        |
| Length of stay (day)                   | 5 (1-68)                | 8 (1-106)               | 0.073         |
| In-hospital mortality (%)              | 0 (0)                   | 3 (7.5)                 | 0.1484        |
| Improving SOFA score on 3-5 days (%)   | 8/9 (88.9)              | 15/17 (88.2)            | 0.9585        |
| Leukocyte count (x10 <sup>9</sup> /L)  | 12.5 ± 3.72             | 14.6 ± 8.62             | 0.188         |
| Neutrophil count (x10 <sup>9</sup> /L) | 10.0 ± 3.44             | 12.3 ± 8.17             | 0.124         |
| Lymphocyte count (x10 <sup>9</sup> /L) | 1.3 (0.5-5.1)           | 0.9 (0.2-4.2)           | 0.053         |
| Monocyte count (x10 <sup>9</sup> /L)   | 0.7 (0.2-2.5)           | 0.9 (0.0-4.0)           | 0.453         |
| Platelet (x10 <sup>9</sup> /L)         | 222 (136-701)           | 187 (43-414)            | <b>0.038</b>  |
| CRP (mg/L)                             | 43 (3-295)              | 118 (3-390)             | <b>0.026</b>  |
| Lactate (mmol/L)                       | 1.45 (0.8-2.9), n = 18  | 2 (0.4-6.5), n = 34     | <b>0.017</b>  |
| Procalcitonin (ng/mL)                  | 0.1, n = 1              | 3.3 (0.1-212.3), n = 14 | NA            |
| Positive culture                       |                         |                         |               |

|                              |              |              |        |
|------------------------------|--------------|--------------|--------|
| From source of infection (%) | 11/24 (45.8) | 20/37 (54.1) | 0.5299 |
| From blood (%)               | 6/21 (28.6)  | 13/32 (40.6) | 0.3775 |

---

241 NA not available

242

243 **Serum cytokines' level are not significantly different between**  
244 **uncomplicated infection and sepsis patients**

245 Infection/ sepsis was associated with changes in immune cell functions. We therefore sought  
246 to determine if the levels of serum cytokines can reflect changes in immune cell functions  
247 during the development of sepsis. In keeping with current literature (20), several  
248 inflammatory cytokines were higher in both uncomplicated infection and sepsis groups when  
249 compared to healthy controls (Fig 2). Serum levels of IL-10 and TNF- $\alpha$  were significantly  
250 higher in sepsis group than healthy controls but no difference was observed between sepsis  
251 and uncomplicated infection. Similarly, IL-6 level was higher in uncomplicated infection/  
252 sepsis patients compared to healthy controls but again no difference was observed between  
253 sepsis and uncomplicated infection.

254

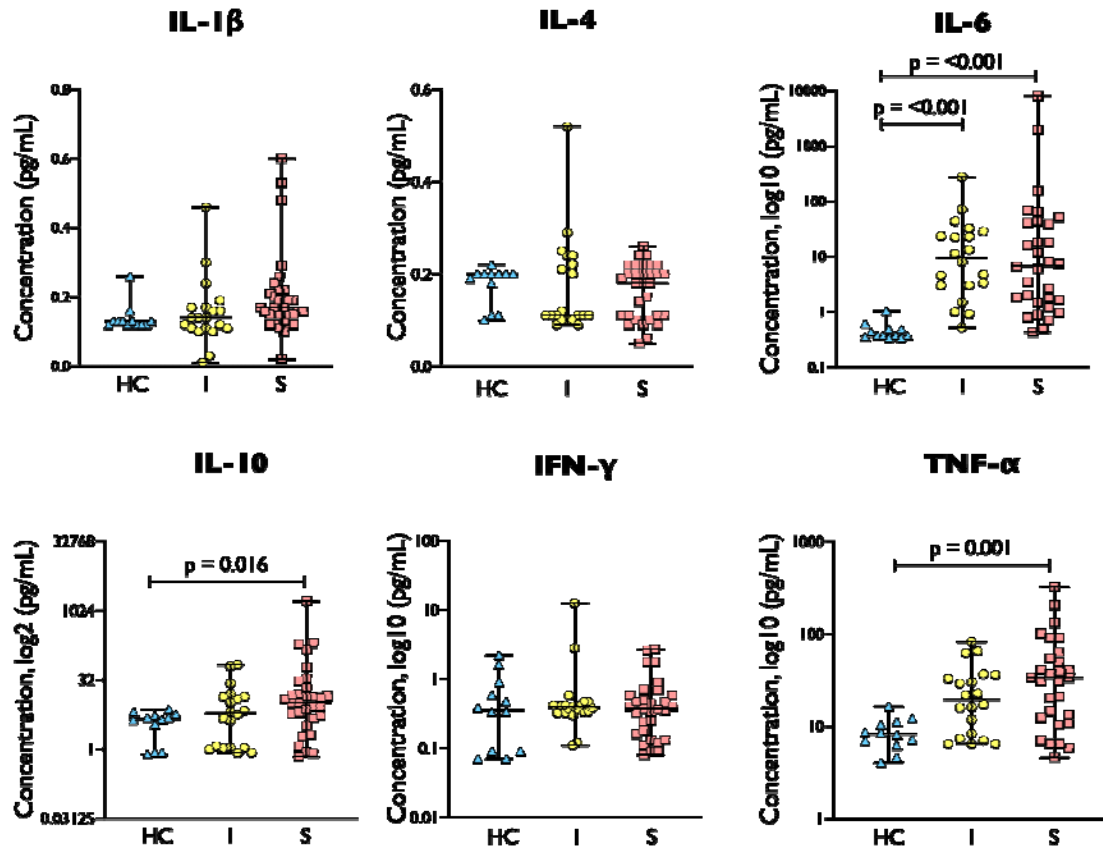

255

256 **Fig 2.** Cytokine levels in healthy control/ HC (n = 12), uncomplicated infection/ I (n = 20)

257 and sepsis/ S (n = 31). Sepsis demonstrated the highest cytokine levels in IL-6, IL-10 and

258 TNF- $\alpha$ . Comparison between groups were performed by Kruskal-Wallis test followed by

259 Dunn's multiple comparison test.

260

261

262 **Downregulations of mitochondrial function-related genes are**

263 **more prominent in sepsis patients**

264 Having found that inflammatory cytokines did not distinguish between uncomplicated

265 infection and sepsis, we next proceeded to investigate whether gene-expression profiling

266 could distinguish between such patients. As an initial explorative step, we performed gene

267 expression profiling in the first 29 patients, as well as 11 healthy controls, recruited into the  
268 study (Supplementary results, S1-S2 Tables).

269

270 In these experiments, 29 out of a total of 90 genes showed differential expression (FDR  
271  $<0.05$ ) across three groups – healthy controls, uncomplicated infection and sepsis groups  
272 (Figure 3A). From these 29 genes, 17 genes were significantly downregulated in infected/  
273 sepsis patients when compared to healthy controls (Figure 3B). Of these 17 genes, 13 genes  
274 were downregulated in the sepsis group but not in the uncomplicated infection groups. The  
275 remaining 4 genes were also downregulated in the uncomplicated infection. Twelve genes  
276 showed upregulation in infected/ sepsis patients compared to healthy controls (Figure 3B). Of  
277 those genes, 5 genes were upregulated in uncomplicated infection as well as in sepsis group.  
278 The other 7 genes were upregulated only in sepsis group.

279

280

281

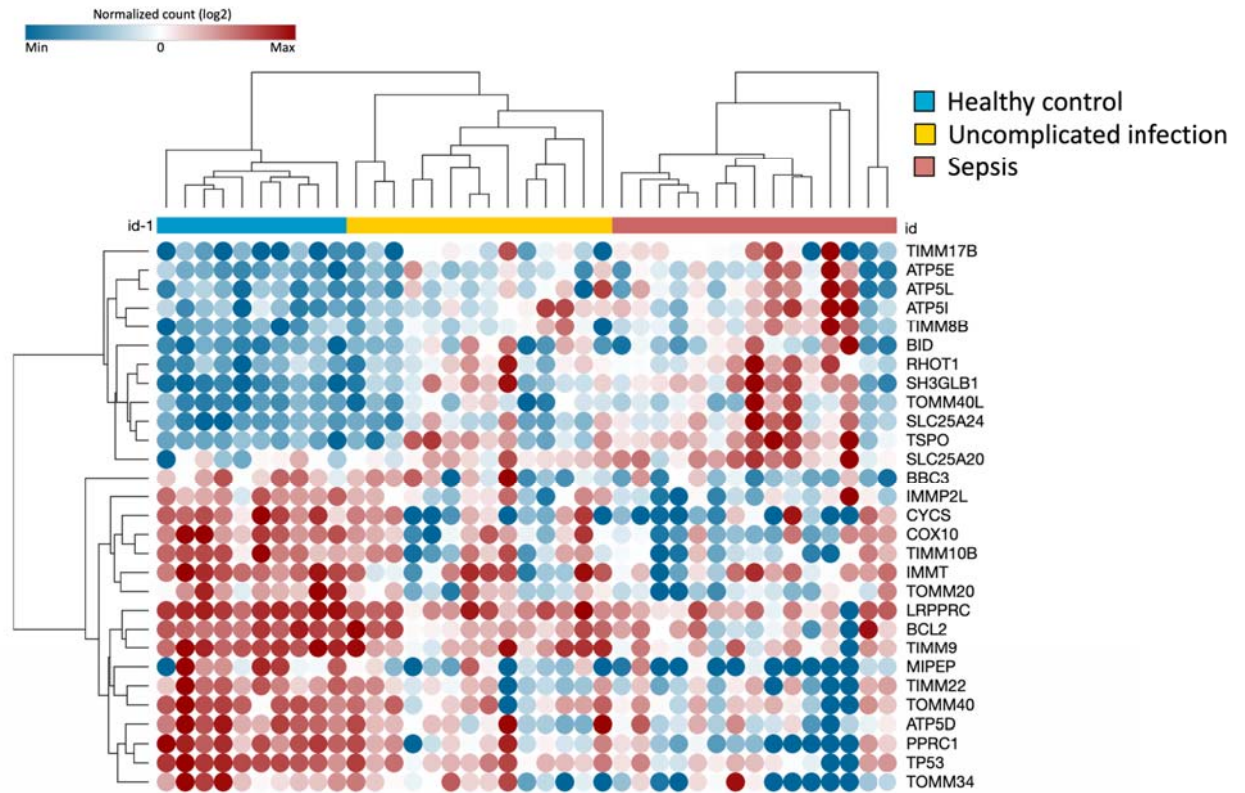

282

283 **Fig 3A.** Heat map demonstrated 29 differentially expressed genes in log<sub>2</sub>-counts. The  
284 samples were grouped using semi-supervised clustering. Each sample is labelled by colour  
285 according to the clinical condition (performed on a subset of 10 healthy controls, 14  
286 uncomplicated infection and 15 sepsis subjects).



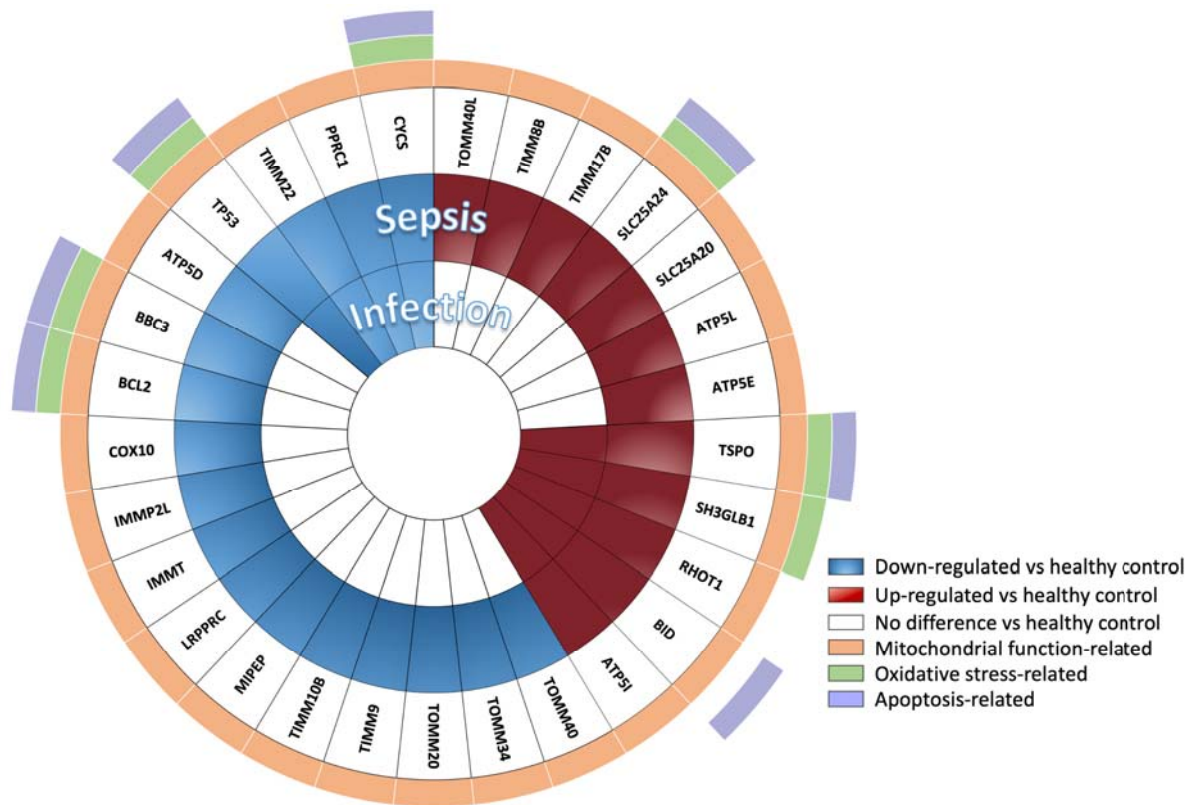

287

288 **Fig 3B.** The differentially expressed genes (FDR <0.05) in uncomplicated infection (n = 14)  
289 and sepsis patients (n = 15) relative to healthy controls' (n = 10). Function of each gene is  
290 indicated by colour (e.g. regulations on mitochondrial function, ROS production and  
291 apoptosis cell death). Twenty genes were expressed differently in sepsis. Comparison  
292 between groups were performed by one-way ANOVA followed by Benjamini-Yakutieli  
293 False Discovery Rate method.

294

295

## 296 **Impaired mitochondrial function is observed in uncomplicated** 297 **infection and sepsis**

298 Having discovered the differences in gene expression related to mitochondrial pathway  
299 between uncomplicated infection and sepsis, we were to confirm it by measuring

300 mitochondrial function of PBMC. Parameters related to mitochondrial functions including  
301 basal respiration, maximal respiration, spare respiratory capacity and ATP production  
302 reduced significantly in sepsis when compared to healthy control group (Figure 4 A-D).  
303 When the sepsis was compared to uncomplicated infection, maximal respiration, spare  
304 respiratory capacity and ATP production were significantly lower in sepsis group. Besides  
305 mitochondrial dysfunction, we also observed a reduced basal ECAR in sepsis when compared  
306 to healthy control (Figure 4E).  
307

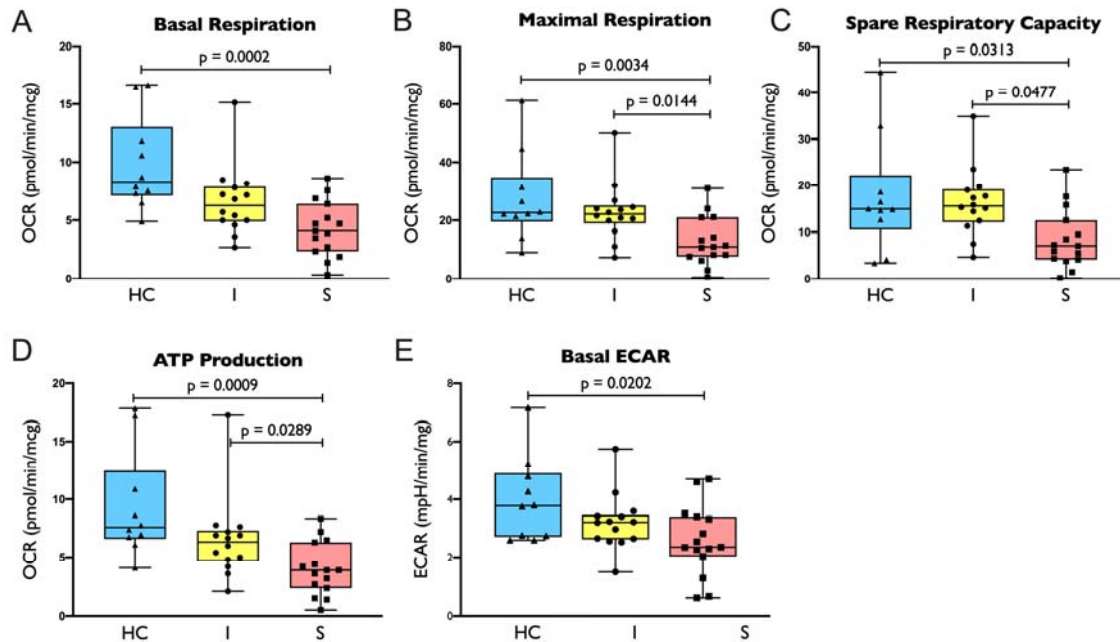

308  
309 **Fig 4.** Oxygen consumption rate (OCR) and extracellular acidification rate (ECAR) on  
310 subjects with gene expression data: 4A. basal respiration, 4B. maximal respiration, 4C. spare  
311 capacity, 4D. ATP production, 4E. basal ECAR in healthy control/ HC (n = 10),  
312 uncomplicated infection/ I (n = 14) and sepsis/ S (n = 15) group. Comparison between groups  
313 were performed by one-way ANOVA followed by Tukey's multiple comparison test.

314

315 Notably, there were 20 mitochondrial-related genes which were differentially expressed in  
316 those with sepsis but not in uncomplicated infection patients (Figure 3B). This finding points  
317 to a potential difference in leukocyte biology between uncomplicated infection and sepsis.

318

319 Having confirmed the evidence of impaired cellular metabolism in the above 29 patients, we  
320 next proceeded to measure the same metabolic parameters for the entire cohort (67 patients  
321 and 20 controls). These measurements again confirmed significant impairment and a trend  
322 towards impaired mitochondrial functions in sepsis and uncomplicated infection patients,  
323 respectively (Supplementary results, S1 Fig). The following findings described hereafter  
324 were performed on the entire cohort.

325

326

### 327 **Increased mitochondrial oxidative stress is observed in** 328 **uncomplicated infection and sepsis patients**

329 Previous research shows that increased mitochondrial oxidative stress is associated with  
330 impaired mitochondrial function in circulating leukocytes (21). Our results support this, as  
331 we observed increased mitochondrial superoxide level, as measured by MitoSOX, in both  
332 uncomplicated infection and sepsis groups when compared to healthy controls (Figure 5A).

333 There was also a trend towards increased total cellular ROS (measured by DCFDA) in  
334 uncomplicated infection and sepsis when compared to healthy controls (Figure 5B) even  
335 though they were not statistically significant.

336

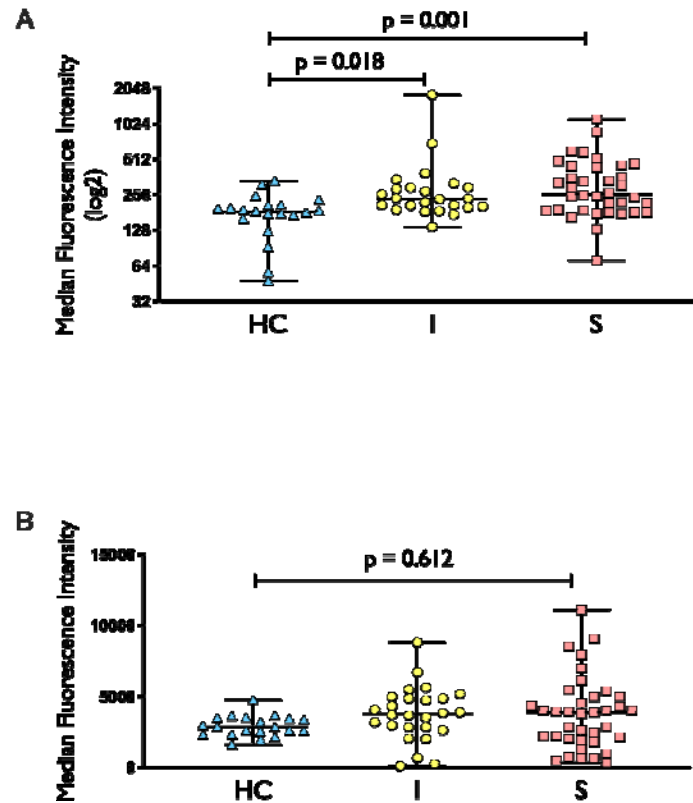

337

338 **Fig 5.** MitoSOX (5A) and DCFDA (5B) staining in healthy control (HC), uncomplicated  
339 infection (I) and sepsis (S). N for MitoSOX = HC (20), I (24), S (36), respectively; n for  
340 DCFDA = HC (20), I (26), S (37), respectively. For MitoSOX dataset, comparison between  
341 groups was performed with Kruskal-Wallis test followed by Dunn's multiple comparison.  
342 For DCFDA dataset, comparison between groups was made using one-way ANOVA  
343 followed by Tukey's multiple comparison.

344

345

346

347

348

349 **Mitochondrial oxidative stress correlates with gene expression**  
350 **level, serum cytokine level and bacteremia**

351 Previous study showed that mitochondrial oxidative stress may be increased by several  
352 factors in infection/ sepsis (22). These factors include increased systemic inflammation (e.g.  
353 proinflammatory cytokines), pathogen factor (presence of bacteremia) and transcriptional  
354 factor (gene expression). To investigate the possible roles of those factors, we performed a  
355 correlation analysis between mitochondrial superoxide levels and: serum cytokine levels,  
356 bacteremia and mitochondrial ROS-related genes including Cytochrome C/ CYCS (electron  
357 transport chain), Tumor Protein P53/ TP53 (maintains cellular redox status), Solute Carrier  
358 Family 25 Member 24/ SLC25A24 (buffers calcium level in mitochondrial matrix) and  
359 Translocator Protein/ TSPO (translocator protein for release of proapoptotic mitochondrial  
360 component).

361

362 Our analyses showed that mitochondrial superoxide level correlated with increased  
363 proinflammatory cytokine TNF- $\alpha$  ( $r = 0.330$ ,  $p < 0.05$ ) but not with IL-6 and IL-10 ( $p > 0.05$ ).  
364 Similarly, mitochondrial superoxide level correlated with expression levels of CYCS, TP53,  
365 SLC24A24 and TSPO ( $r_s = -0.4926, -0.4422, 0.4382, 0.4835$ , respectively;  $p < 0.05$ ).  
366 Additionally, a higher oxidative stress level was observed in patients with as compared to  
367 those without bacteremia ( $p < 0.05$ ) (S2 Fig).

368

369

370

371

## 372 **Impact of increased oxidative stress on leukocyte function and** 373 **survival**

374 With increased levels of mitochondrial superoxide observed in both uncomplicated infection  
375 and sepsis groups, we evaluated the association of this increase with leukocyte mitochondrial  
376 functions. Our analyses revealed a significant inverse correlation between an increased  
377 mitochondrial superoxide level and mitochondrial function ( $p < 0.05$ ) (S3 Fig). The findings  
378 were consistent across all parameters as measured by our cellular metabolism assay.

379

380 Existing literature shows both impaired mitochondrial function (23) and increased intra-  
381 mitochondrial oxidative stress (24) may lead to the activation of apoptotic pathways.  
382 However, we did not observe any significant increase in apoptosis measured by Annexin V  
383 and PI in PBMCs from either the uncomplicated infection or the sepsis group (S4 Fig).

384

385

## 386 **Discussion**

387 Currently, it remains unclear whether defective cellular metabolism exists in circulating  
388 leukocytes of patients who are in the early stage sepsis. Our study provide evidence that the  
389 defect is present in patients who are infected and more so in those who progress to sepsis.  
390 The impaired cellular metabolism is evident across several platforms including gene-  
391 expression profiling, cellular metabolism analyses and intra-mitochondrial reactive oxygen  
392 species measurement.

393

394 Although we do not have direct evidence to implicate oxidative stress as a causal factor in the  
395 impairment of cellular metabolism, we do observe a moderate correlation between the degree

396 of mitochondrial oxidative stress and the extent of cellular respiration impairment, i.e.  
397 increasing mitochondrial oxidative stress correlates with worsening of cellular respiration.  
398 The increase in mitochondrial oxidative stress level is associated with higher  
399 proinflammatory cytokine, bacteremia and gene dysregulation. Inflammatory cytokine (25)  
400 and dysregulation of genes (26) are known to be associated with oxidative stress and, in  
401 general, reduced cellular respiration (27). The presence of bacteremia, as shown in this study,  
402 is also associated with increased oxidative stress since bacterial infection is the trigger of  
403 ROS production (28).

404

405 The relationship between proinflammatory cytokine, oxidative stress and impaired  
406 mitochondrial function is complex. The levels of proinflammatory cytokines significantly  
407 show correlation with oxidative stress and impaired mitochondrial function. Mitochondrial  
408 oxidative stress itself can further activate inflammatory response through the production of  
409 signalling molecules that propagate cellular dysfunction (29). Therefore, it is likely that  
410 changes in systemic inflammation milieu, intra-mitochondrial oxidative stress and cellular  
411 respiration are intricately linked. It is beyond the scope of our study to delineate such  
412 complex relationship; clearly, additional mechanistic studies are needed in the future.

413

414 We also observe that in uncomplicated infection patients, the circulating immune cells do not  
415 shift the ATP production to glycolysis. Existing literatures indicate that host cells expect to  
416 switch their main metabolism into glycolysis when stressed (8, 30). The lack of such a switch  
417 might be because immune cells may utilize pathways alternative to glycolysis (31) to  
418 generate more ATP. Additionally, different immune cell subsets prefer to use different  
419 dominant type of metabolism, e.g. naïve T cells are dependent on mitochondrial respiration  
420 as their primary metabolic pathway while activated T cells exhibit higher glycolysis (32).

421 Further studies are needed to address this issue, as by using glycolysis-specific assay in  
422 purified cell subsets.

423 This study demonstrates the lack of cytokine use as a marker for staging sepsis patients (33).  
424 The increase of cytokines found in this study could not distinguish sepsis from the  
425 uncomplicated infection, on which the routine laboratories, such as CRP, lactate level and  
426 platelet count, could discriminate those severities better. This indicates the need to develop  
427 more specific yet practical markers that enable us to stage infection patients according to  
428 their risk severities.

429

430 Our findings have some important therapeutic implications. The observed increased  
431 mitochondrial oxidative stress in uncomplicated infection could contribute to later  
432 mitochondrial dysfunction. This observation should be stretched in future mechanistic  
433 studies. If the relationship between mitochondrial oxidative stress and mitochondrial  
434 impairment is confirmed, it may open up opportunity for early intervention (e.g.  
435 mitochondrial-targeted antioxidant) for patients in early stage of infection.

436

437 We have used multiple modalities from transcriptomic to functional analyses to investigate  
438 the change in mitochondrial and immune function which has strengthened this research.  
439 Additionally, this study included infection patients from ED instead of the “established”  
440 sepsis from intensive care unit (ICU). Therefore, we could observe metabolic changes in  
441 broader spectrum of disease rather than simply comparing the changes between severe  
442 disease and the normal end. In regard to it, the finding of impaired cellular metabolism in  
443 uncomplicated infection consequently suggests that past biomarkers developed in the  
444 critically ill, i.e. ICU, patients might have low relevance in ED setting.

445



446 Some limitations are notified in this study. First, the study participants are highly  
447 heterogenous in comorbidities and age. Those factors should be put into consideration when  
448 interpreting the result, i.e. patients with diabetes mellitus or older age might have different  
449 basal oxidative stress level. Secondly, most of the study participants have favorable outcome,  
450 i.e. minimal number of mortality. In the same manner, the analysis is ideally explored in  
451 patients with poor outcome, as the result might be variable from those with good prognosis.  
452 Thirdly, total ROS is not an ideal assay to measure oxidative stress since, technically,  
453 intermediate radical will falsely amplify the fluorescence intensity (34, 35). The non-  
454 significant signal of total cellular ROS might be explained by this issue.

455

456 Surprisingly, we did not observe increased cell death in this study, despite significant  
457 increase in mitochondrial oxidative stress levels and impairment of mitochondrial function.  
458 Similar findings are also noted in previous studies (36, 37) who showed no, or slight, increase  
459 in apoptosis from flow cytometry measurement in sepsis patients. This could be because  
460 dying cells are rapidly removed by reticuloendothelial system and, therefore, are less likely to  
461 appear in circulating blood (38). Another possible explanation could be that dying cells are  
462 not captured during sample processing procedure. To address this issue, early marker of  
463 apoptosis can be used in future study (39, 40).

464

465 In conclusion, impairment of cellular metabolism, presented mainly as mitochondrial  
466 dysfunction, is evident in the immune cells of infection patients without presenting sepsis.  
467 Oxidative stress, along with inflammation and transcription regulation, might be a potential  
468 initiator, amplifier or victim to explain the impairment.

469

470

471

472

## 473 **Acknowledgement**

474 We gratefully acknowledge the contribution of Joey Lai, PhD, Stephen Schibeci, Nicole  
475 Fewings, PhD and Lawrence Ong, PhD for their input in data analysis; Sydney Informatics  
476 Hub, a Core Research Facility of the University of Sydney; and Indonesia Endowment Fund  
477 for Education (LPDP) for the grant support. No compensation was provided for those  
478 assistances.

479

480

## 481 **References**

- 482 1. Rudd KE, Kissoon N, Limmathurotsakul D, Bory S, Mutahunga B, Seymour CW, et  
483 al. The global burden of sepsis: barriers and potential solutions. *Crit Care*.  
484 2018;22:232.
- 485 2. Gotts JE, Matthay MA. Sepsis: pathophysiology and clinical management. *BMJ*.  
486 2016;353:i1585.
- 487 3. Delano MJ, Ward PA. The immune system's role in sepsis progression, resolution and  
488 long-term outcome. *Immunol Rev*. 2016;274(1):330-53.
- 489 4. Delano MJ, Ward PA. Sepsis-induced immune dysfunction: can immune therapies  
490 reduce mortality? *J Clin Invest*. 2016;126(1):23-31.
- 491 5. Jensen IJ, Sjaastad FV, Griffith TS, Badovinac VP. Sepsis-induced T cell  
492 immunoparalysis: the ins and outs of impaired T cell immunity. *J Immunol*.  
493 2018;200(5):1543-53.

- 494 6. Boulos M, Astiz ME, Barua RS, Osman M. Impaired mitochondrial function induced  
495 by serum from septic shock patients is attenuated by inhibition of nitric oxide  
496 synthase and poly(ADP-ribose) synthase. *Crit Care Med.* 2003;31(2):353-8.
- 497 7. Pearlstein DP, Ali MH, Mungai PT, Hynes KL, Gewertz BL, Schumacker PT. Role of  
498 mitochondrial oxidant generation in endothelial cell responses to hypoxia.  
499 *Arterioscler Thromb Vasc Biol.* 2002;22(4):566-73.
- 500 8. Cheng S-C, Scicluna BP, Arts RJW, Gresnigt MS, Lachmandas E, Giamarellos-  
501 Bourboulis EJ, et al. Broad defects in the energy metabolism of leukocytes underlie  
502 immunoparalysis in sepsis. *Nature Immunol.* 2016;17(4):406-13.
- 503 9. Carré JE, Orban J-C, Re L, Felsmann K, Iffert W, Bauer M, et al. Survival in critical  
504 illness is associated with early activation of mitochondrial biogenesis. *Am J Resp Crit*  
505 *Care Med.* 2010;182(6):745-51.
- 506 10. Brealey D, Brand M, Hargreaves I, Heales S, Land J, Smolenski R, et al. Association  
507 between mitochondrial dysfunction and severity and outcome of septic shock. *Lancet.*  
508 2002;360:219-23.
- 509 11. Garrabou G, Morén C, López S, Tobías E, Cardellach F, Miró Ò, et al. The effects of  
510 sepsis on mitochondria. *J Infect Dis.* 2012;205(3):392-400.
- 511 12. Japiassú AM, Santiago AP, d'Avila JC, Garcia-Souza LF, Galina A, Faria-Neto HCC,  
512 et al. Bioenergetic failure of human peripheral blood monocytes in patients with  
513 septic shock is mediated by reduced F1Fo adenosine-5'-triphosphate synthase activity.  
514 *Crit Care Med.* 2011;39(5):1056-63.
- 515 13. Merz TM, Pereira AJ, Schürch R, Schefold JC, Jakob SM, Takala J, et al.  
516 Mitochondrial function of immune cells in septic shock: a prospective observational  
517 cohort study. *PLoS One.* 2017;12(6):e0178946.

- 518 14. Shalova IN, Lim JY, Chittezhath M, Zinkernagel AS, Beasley F, Hernández-Jiménez  
519 E, et al. Human monocytes undergo functional re-programming during sepsis  
520 mediated by Hypoxia-Inducible Factor-1 $\alpha$ . *Immunity*. 2015;42(3):484-98.
- 521 15. Bone RC, Balk RA, Cerra FB, Dellinger P, Fein AM, Knaus WA, et al. Definitions  
522 for sepsis and organ failure and guidelines for the use of innovative therapies in  
523 sepsis. ACCP/ SCCM Consensus Conference. *Chest*. 1992;101(6):1481-3.
- 524 16. Singer M, Deutschman CS, Seymour CW, Shankar-Hari M, Annane D, Bauer M, et  
525 al. The Third International Consensus Definitions for Sepsis and Septic Shock  
526 (Sepsis-3). *JAMA*. 2016;315(8):801–10.
- 527 17. Fabregat A, Jupe S, Matthews L, Sidiropoulos K, Gillespie M, Garapati P, et al. The  
528 Reactome pathway knowledgebase. *Nucleic Acids Res*. 2018;46(D1):D649-55.
- 529 18. Agilent Technologies, Inc. Agilent Seahorse XF Cell Mito Stress Test Kit. User guide  
530 kit 103015-100 [Internet]. 2019 [cited 2020 May 31]. Available from:  
531 <https://www.agilent.com>
- 532 19. Dranka BP, Benavides GA, Diers AR, Giordano S, Zelickson BR, Reily C, et al.  
533 Assessing bioenergetic function in response to oxidative stress by metabolic profiling.  
534 *Free Radic Biol Med*. 2011;51(9):1621-35.
- 535 20. Matsumoto H, Ogura H, Shimizu K, Ikeda M, Hirose T, Matsuura H, et al. The  
536 clinical importance of a cytokine network in the acute phase of sepsis. *Sci Rep*.  
537 2018;8:13995.
- 538 21. Chen Y, Zhou Z, Min W. Mitochondria, Oxidative Stress and Innate Immunity. *Front*  
539 *Physiol*. 2018;9:1487.
- 540 22. Li X, Fang P, Mai J, Choi ET, Wang H, Yang X-f. Targeting mitochondrial reactive  
541 oxygen species as novel therapy for inflammatory diseases and cancers. *J Hematol*  
542 *Oncol*. 2013;6:19.

- 543 23. Kushnareva Y, Newmeyer DD. Bioenergetics and cell death. *Ann N Y Acad Sci.*  
544 2010;1201:50-7.
- 545 24. Redza-Dutordoir M, Averill-Bates DA. Activation of apoptosis signalling pathways  
546 by reactive oxygen species. *BBA Mol Cell Res.* 2016;1863(12):2977-92.
- 547 25. Lavieri R, Piccioli P, Carta S, Delfino L, Castellani P, Rubartelli A. TLR  
548 costimulation causes oxidative stress with unbalance of proinflammatory and anti-  
549 inflammatory cytokine production. *J Immunol.* 2014;192(11):5373-81.
- 550 26. Bime C, Zhou T, Wang T, Slepian MJ, Garcia JGN, Hecker L. Reactive oxygen  
551 species-associated molecular signature predicts survival in patients with sepsis. *Pulm*  
552 *Circ.* 2016;26(2):196-201.
- 553 27. Nucci LA, Santos SS, Brunialti MK, Sharma NK, Machado FR, Assunção M, et al.  
554 Expression of genes belonging to the interacting TLR cascades, NADPH-oxidase and  
555 mitochondrial oxidative phosphorylation in septic patients. *PLoS One.*  
556 2017;12(2):e0172024.
- 557 28. Ivanov AV, Bartosch B, Isaguliantz MG. Oxidative stress in infection and consequent  
558 disease. *Oxid Med Cell Longev.* 2017;2017:3496043.
- 559 29. Vringer E, Tait SWG. Mitochondria and inflammation: cell death heats up. *Front Cell*  
560 *Dev Biol.* 2019;7:100.
- 561 30. Everts B, Amiel E, Windt GJWvd, Freitas TC, Chott R, Yarasheski KE, et al.  
562 Commitment to glycolysis sustains survival of NO-producing inflammatory dendritic  
563 cells. *Blood.* 2012;120(7):1422-31.
- 564 31. Pearce EL, Pearce EJ. Metabolic pathways in immune cell activation and quiescence.  
565 *Immunity.* 2013;38(4):633-43.

- 566 32. Angajala A, Lim S, Phillips JB, Kim J-H, Yates C, You Z, et al. Diverse roles of  
567 mitochondria in immune responses: novel insights into immuno-metabolism. *Front*  
568 *Immunol.* 2018;9:1605.
- 569 33. Lvovschi V, Arnaud L, Parizot C, Freund Y, Juillien G, Ghillani-Dalbin P, et al.  
570 Cytokine profiles in sepsis have limited relevance for stratifying patients in the  
571 emergency department: A prospective observational study. *PLoS One.*  
572 2011;6(12):e28870.
- 573 34. Kalyanaraman B, Darley-USmar V, Davies KJA, Dennery PA, Forman HJ, Grisham  
574 MB, et al. Measuring reactive oxygen and nitrogen species with fluorescent probes:  
575 challenges and limitations. *Free Radic Biol Med.* 2012;52:1-6.
- 576 35. Dikalov SI, Harrison DG. Methods for detection of mitochondrial and cellular  
577 reactive oxygen species. *Antioxid Redox Signal.* 2014;20(2):372-82.
- 578 36. Turrel-Davin F, Guignant C, Lepape A, Mouglin B, Monneret G, Venet F.  
579 Upregulation of the pro-apoptotic genes BID and FAS in septic shock patients. *Crit*  
580 *Care.* 2010;14:R133.
- 581 37. Adrie C, Bachelet M, Vayssier-Taussat M, Russo-Marie F, Bouchaert I, Adib-Conquy  
582 M, et al. Mitochondrial membrane potential and apoptosis peripheral blood  
583 monocytes in severe human sepsis. *Am J Respir Crit Care Med.* 2001;164:389-95.
- 584 38. Hotchkiss RS, Swanson PE, Cobb JP, Jacobson A, Buchman TG, Karl IE. Apoptosis  
585 in lymphoid and parenchymal cells during sepsis: findings in normal and T- and B-  
586 deficient mice. *Crit Care Med.* 1997;25:1298–307.
- 587 39. Duplessis C, Gregory M, Frey K, Bell M, Truong L, Schully K, et al. Evaluating the  
588 discriminating capacity of cell death (apoptotic) biomarkers in sepsis. *J Intensive*  
589 *Care.* 2018;6:72.

590 40. Hofer S, Brenner T, Bopp C, Steppan J, Lichtenstem C, Weitz J, et al. Cell death  
591 serum biomarkers are early predictors for survival in severe septic patients with  
592 hepatic dysfunction. Crit Care. 2009;13:R93.

593

## 594 **Supporting information**

### 595 **Supplementary results**

596 Downregulation of mitochondrial function-related genes is observed in sepsis

597 Impaired mitochondrial function is observed in uncomplicated infection and sepsis

### 598 **Supplementary tables**

599 **S1 Table.** List of genes on NanoString's mitochondrial biogenesis and function panel

600 **S2 Table.** Demographic and clinical characteristic of overall subjects vs subset of subjects  
601 for gene expression analysis

### 602 **Supplementary figures**

603 **S1 Fig.** Oxygen consumption rate (OCR) and extracellular acidification rate (ECAR) on  
604 subjects with gene expression data

605 **S2 Fig.** MitoSOX level in non-bacteremia and bacteremia subjects

606 **S3 Fig.** Correlation matrix between MitoSOX level and mito stress test parameters

607 **S4 Fig.** Annexin V<sup>+</sup> and propidium iodide<sup>-</sup> population in healthy control, uncomplicated  
608 infection and sepsis
